1 **Abnormal craniofacial and spinal bone development with *col2a1a* depletion in a zebrafish**  
2 **model of CHARGE syndrome**

3 Maximilian Breuer<sup>1#</sup>; \*; Maximilian Rummeler<sup>2#</sup>; Charlotte Zaouter<sup>1</sup>; Bettina M. Willie<sup>2##</sup>;  
4 Shunmoogum A. Patten<sup>1,3##</sup>

5 #, ## authors contributed equally

6 **Affiliations:**

- 7 1. INRS – Centre Armand Frappier Santé Biotechnologie, 531 Boulevard des Prairies, Laval,  
8 QC, Canada, H7V 1B7  
9 2. Research Centre, Shriners Hospital for Children-Canada, Department of Pediatric Surgery,  
10 McGill University, 1003 Decarie Blvd, Montreal, Canada H4A 0A9  
11 3. Centre d'Excellence en Recherche sur les Maladies Orphelines - Fondation Courtois  
12 (CERMO-FC), Université du Québec à Montréal (UQAM), Montréal, QC, Canada

13

14 **\*Correspondence:** Correspondence should be addressed to  
15 Dr. Maximilian Breuer  
16 INRS- Centre Armand-Frappier Santé et Biotechnologie  
17 531 Boulevard des Prairies  
18 Laval, Quebec  
19 H7V 1B7  
20 Canada  
21 [Maximilian.Breuer@iaf.inrs.ca](mailto:Maximilian.Breuer@iaf.inrs.ca)  
22 +1 (438) 341-0445

23

24

25

26

27

28

29

30

31

32 **Conflict of Interest**

33 The authors declare no conflicts of interest

34 **Abstract**

35 CHARGE syndrome patients commonly display craniofacial abnormalities. Furthermore, most  
36 patients show features of idiopathic scoliosis, reduced bone mineral density and in a few cases  
37 osteopenia. While several clinical cases and studies have documented the skeletal deformities  
38 in CHARGE syndrome bearing *CHD7* mutations, the underlying mechanisms of the disorder  
39 remain elusive. Here, we detect and quantitatively analyze skeletal abnormalities in larval and  
40 adult *chd7<sup>-/-</sup>* zebrafish.

41 We show that young *chd7<sup>-/-</sup>* larvae present with abnormal craniofacial development, especially  
42 related to cartilage. We also observe scoliosis-like spinal deformations at 9 dpf. Gene  
43 expression analysis confirmed the reduction of osteoblast markers and Ppar $\gamma$  targets. MicroCT  
44 analyses identified abnormal craniofacial structures, Weberian apparatus and vertebral body  
45 morphology in *chd7<sup>-/-</sup>* mutants, with highly mineralized inclusions, along with significant  
46 variances in bone mineral density and bone volume. Notably, we detect a specific depletion of  
47 Col2a1a in the cartilage of craniofacial regions and vertebrae, in line with a significantly  
48 reduced number of chondrocytes.

49 Our study is the first to elucidate the mechanisms underlying morphological changes in  
50 craniofacial structure and vertebrae of adult *chd7<sup>-/-</sup>* zebrafish. The *chd7<sup>-/-</sup>* mutant zebrafish will  
51 be beneficial in future investigations of the underlying pathways of both craniofacial and spinal  
52 deformities commonly seen in CHARGE syndrome.

53

54

55

56 Keywords: CHARGE Syndrome, Chd7, idiopathic scoliosis, zebrafish, Col2a1

## 57 **Introduction**

58 Impaired bone development, craniofacial dysmorphism and spinal abnormalities are a major  
59 health concern in various genetic disorders. Among these, idiopathic scoliosis is the most  
60 common skeletal abnormality observed in children (1). Idiopathic scoliosis is a curvature of the  
61 spine with unidentified genetic cause. However, many risk genes have been connected to the  
62 underlying mechanisms (2). One of these related genetic disorders is the congenital  
63 multisystemic CHARGE syndrome (CS) named after the major characteristics of **C**oloboma,  
64 **H**ear defects, **A**tresea chonae, **R**etarded growth, **G**enital and **E**ar abnormalities (3-5). Though,  
65 considering the wide variety of observed phenotypes, the list of characteristics has been  
66 continuously augmented to include craniofacial abnormalities and spinal deformations (6-8).  
67 Along these lines, CS is closely associated with skeletal deformities such as craniofacial  
68 dysmorphisms, idiopathic scoliosis, kyphosis and hemivertebrae (9). In fact, idiopathic  
69 scoliosis is observed in a majority of CS cases, with studies showing over 60% of patients  
70 having diagnosed scoliosis at an average age of just over 6 years (10-12). In some cases, the  
71 areal bone mineral density (aBMD) is reduced (13).

72 CS is most commonly caused by a mutation in the chromodomain ATP-dependant helicase 7  
73 (CHD7). Mutations are distributed evenly throughout the gene and the vast majority of cases  
74 are sporadic, with only very few cases of familial CS (7, 14-16). Analysis of pathways related  
75 to CHD7 show involvement in neural crest differentiation/proliferation/migration and stem cell  
76 quiescence (17-19). Furthermore, studies focusing on CS have identified regulatory  
77 mechanisms of CHD7 in the immune response and more strikingly in brain development (20,  
78 21). Most recently, CHD7 has been connected to abnormal GABAergic development resulting  
79 in an autistic-like behavior (Jamadagni et al., unpublished data). While the function of CHD7  
80 has been extensively studied, little attention has been given to the underlying mechanisms in  
81 skeletal development (22). Some studies have directly linked CHD7 to osteogenesis (23, 24).

82 Investigation in cell cultures have shown a dependency on CHD7 for successful differentiation,  
83 more specifically to a differentiation complex with SETD1B, NLK and SMAD1 resulting in  
84 depleted osteogenesis upon depletion of CHD7 in favour of adipogenesis by regulating PPAR $\gamma$   
85 target genes (23, 24). Various models to investigate this role in vivo have been proposed. A  
86 mouse model for Chd7 deficiency, termed “looper” presents with ear ossicle malformations,  
87 but no spinal deformities (25). However, mouse models for Chd7 deficiency have limitations,  
88 as null mutants are embryonically lethal by 10 days (26). Yet, a recent zebrafish model has  
89 proven valuable in the modelling of *chd7* dependent CS revealing a reduction in vertebrae  
90 mineralization of young larvae (27).

91 Zebrafish have become increasingly relevant in the study of fundamental bone development  
92 and bone related disorders (28-30), including scoliosis, osteoporosis, age related osteoarthritis  
93 (31, 32). Notably, the spinal structure in zebrafish has been characterized in detail and  
94 comprises three major regions: the Weberian apparatus, a specialized structure consisting of the  
95 first four vertebrae connecting the auditory system and the swim bladder to amplify sound  
96 vibrations, the precaudal vertebrae which are connected to neural arch and spines and caudal  
97 vertebrae of the tail region with neural and hemal arch (33). Simplicity of analysis in zebrafish  
98 to investigate spinal structures has been used to understand the effects of mechanical loading  
99 on bone mineralization (30, 34). Zebrafish have specific advantages in the analysis of skeletal  
100 development such as the closely related structure to humans. They also have rapid bone  
101 development with first mineralization of vertebrate occurring after only 5 days post fertilization  
102 (dpf). Additionally, the *ex utero* development and transparency of young larvae simplifies the  
103 use of *in vivo* staining and transgenic lines to allow for the analysis of early calcification in  
104 zebrafish bony structures (35-38). Furthermore, the simplicity of high-throughput drug  
105 screening in this teleost model makes the model highly useful for investigating new drug targets  
106 and effect on skeletal development (39, 40). These advantages along with their high

107 remodelling efficiency of skeletal structures including their possibility to regenerate fins, as  
108 well as the effectiveness to reproduce spinal deformity phenotypes have raised interest in the  
109 zebrafish model (41, 42). Studies in zebrafish have shown a close link to collagen related genes  
110 (43, 44). These highly conserved pathways between zebrafish and humans allow us to  
111 investigate the underlying pathomechanisms linking CHD7 to idiopathic scoliosis and other  
112 skeletal abnormalities.

113 In the present study we describe for the first time a detailed analysis of craniofacial and skeletal  
114 anomalies in a zebrafish *chd7*<sup>-/-</sup> mutant model for CS. Early larvae screens reveal a striking  
115 dysmorphism of craniofacial structures, as well as delay of mineralization of vertebrae bodies  
116 linked to deficient osteoblast differentiation. Gene expression and IHC analysis reveals striking  
117 reduction in osteoblast, chondrocyte, and collagen matrix markers, particularly displaying  
118 abolished levels of Col2a1. Finally, extensive microCT analysis in adults show abnormal  
119 mineralization and morphology in all major structures of the zebrafish skeleton.

## 120 **Results**

### 121 *Zebrafish chd7<sup>-/-</sup> larvae show craniofacial and spinal deformities*

122 We recently generate a *chd7* knockout zebrafish line using CRISPR/Cas9 with a single  
123 nucleotide insertion causing a frame-shifting mutation and a premature stop codon 8 amino  
124 acids after the mutation site (Jamadagni et al., unpublished data). Consistent with our previous  
125 findings using a transient *chd7* morpholino knockdown model (27), this stable *chd7*<sup>-/-</sup> zebrafish  
126 mutant using CRISPR/Cas9 that replicates hallmarks of CS including craniofacial and skeletal  
127 defects (Fig. 1). To further investigate the bone deformities in *chd7*<sup>-/-</sup> zebrafish in detail, we  
128 first screened young *chd7*<sup>-/-</sup> larvae at 6 dpf and 9 dpf for morphological abnormalities at early  
129 developmental stages. At 6 dpf we observed craniofacial changes, such as reduced length of the  
130 palatoquadrate and increased angle of the ceratohyal (Fig 1A). Calcein staining also reveals  
131 reduced mineralization of the facial structures, noticeably towards the quadrate and opercle (Fig

132 1B). At this stage *chd7*<sup>-/-</sup> larvae were minimally, yet significantly, smaller than control (Cntrl)  
133 larvae, however this is in line with the expected CS phenotype of growth retardation and neural  
134 crest abnormalities in patients (Supplemental Fig. 1A).

135 39% of *chd7*<sup>-/-</sup> larvae exhibited highly varying, scoliosis-like phenotypes at both precaudal and  
136 caudal regions of the spine (Fig. 1C). Additionally, some of these also presented with a  
137 kyphosis-like phenotype (Supplemental Fig. 1B). We found that *chd7*<sup>-/-</sup> larvae were still  
138 reactive to a touch response, even with the severe morphological phenotype.

139 *chd7*<sup>-/-</sup> larvae have a spinal mineralization deficit that is nutrient dependent

140 Given the spinal deformities in 9 dpf *chd7*<sup>-/-</sup> larvae, we next sought to investigate mineralization  
141 during larval development. Calcein staining for fluorochrome labeling of bones revealed no  
142 delay in the onset of mineralization of the first precaudal vertebrae at 6 dpf. Upon further  
143 development, at 9 dpf, *chd7*<sup>-/-</sup> larvae showed a significant reduction in the number of calcified  
144 vertebrae (Fig. 1D, E). Notably, *chd7*<sup>-/-</sup> larvae were less efficient in complete calcification of  
145 vertebrae towards the posterior region of the spine (Fig. 1D).

146 Since calcification of the bone matrix is dependent on mineral uptake from food, we tested how  
147 the onset and development of vertebral bone structure calcification in 9 dpf *chd7*<sup>-/-</sup> zebrafish  
148 was dependent on nutrition accessibility. Notably, wildtype and *chd7*<sup>-/-</sup> larvae showed no  
149 difference in the number of mineralized vertebrae in a starvation situation between 5 dpf and 9  
150 dpf. Expectedly, we observed significant differences when food was available from 5 dpf until  
151 9 dpf, with *chd7*<sup>-/-</sup> zebrafish having a reduced number of mineralized vertebrae compared to  
152 controls. The *chd7*<sup>-/-</sup> larvae had the same number of mineralized vertebrae when food was  
153 available or absent (Fig. 1 D, E). Starvation in zebrafish larvae between 5 dpf and 9 dpf also  
154 resulted in smaller yolks, which is to be expected, considering the high dependency on nutrition  
155 supply by the yolk. Surprisingly, we found that Weberian vertebrae, which are the first 4

156 vertebrae of the spinal column, were more rapidly calcified in *chd7*<sup>-/-</sup> larvae than in controls  
157 (Fig. 1D arrows, Fig 1 F).

158 We investigated if mineralization recovered in later development. Reduced mineralization  
159 remained evident in 4-week-old juvenile zebrafish with spinal deformities. Alizarin red staining  
160 revealed decreased mineralization of caudal vertebrae, with striking deficiency toward the  
161 vertebral body (Supplemental Fig. 1. D).

#### 162 *Osteoblast differentiation is impaired in chd7*<sup>-/-</sup> larvae

163 CHD7 has been shown to regulate osteogenesis by controlling PPAR $\gamma$  to promote skeletal  
164 development and regulate expression of promoting genes. To examine if the Ppar $\gamma$  pathway is  
165 directly involved in the observed bone mineralization deficiency and abnormal morphology in  
166 *chd7*<sup>-/-</sup> larvae, we tested for Ppar $\gamma$  target gene expression and osteoblast differentiation marker  
167 genes at the onset of the bone defect at 9 dpf (Fig. 1G). The key targets for Ppar $\gamma$ , *runx2a* and  
168 *runx2b*, which are expressed mostly in craniofacial regions at this stage, were significantly  
169 downregulated in *chd7*<sup>-/-</sup> larvae compared to controls. Additionally, other markers for  
170 osteogenesis were also affected, including a significant downregulation of osteoblast markers  
171 *sp7/osterix*, *bglap* and *postna* (Fig. 1G). The *chd7*<sup>-/-</sup> larvae also had significantly lower levels  
172 of osteocyte markers while other genes regulating mineralization such as *acp5a* and *sost*, while  
173 *mgp* remained unchanged compared to control larvae (Fig 1H). We also detected a significant  
174 upregulation of the osteoclast marker *ctsk* in *chd7*<sup>-/-</sup> larvae.

#### 175 *Abnormal development of craniofacial regions and the Weberian apparatus in adult chd7*<sup>-/-</sup> 176 *zebrafish*

177 To assess the effects of *chd7* deficiency on bone development, including craniofacial and  
178 vertebral growth and maturation, we analyzed bone morphology and mass using microCT in  
179 adult zebrafish. Morphologically, adult *chd7*<sup>-/-</sup> zebrafish were unchanged in body length.

180 Since mineralization and morphology in the young larvae varied in craniofacial regions, as well  
181 as from anterior to posterior regions of the spine, we decided to analyze the four major bony  
182 structures of the zebrafish: the skull, Weberian apparatus, precaudal and caudal vertebrae. The  
183 skull was notably changed in *chd7<sup>-/-</sup>* zebrafish in comparison to controls (Fig. 2A-D). In  
184 particular, we observed significant alterations in the mandibular angle and length (Fig. 2E, F).  
185 The face of *chd7<sup>-/-</sup>* zebrafish was also notably deformed compared to control zebrafish, with a  
186 significantly increased craniofacial angle (Fig. 2G). Further, the angle of the mandibular arch  
187 was wider in *chd7<sup>-/-</sup>* zebrafish. Lastly, 3 out of 5 *chd7<sup>-/-</sup>* zebrafish presented with a warped skull,  
188 with the tip of the dentary deviating from the fish's midline.

189 Another key structure, the Weberian apparatus with its supraneurals, intercalarium, tripus and  
190 parapophysis, had thinner and smaller morphology in *chd7<sup>-/-</sup>* adults compared to controls (Fig.  
191 2I). We further performed a detailed analysis of volumetric bone mineral density (vBMD), bone  
192 volume (BV), total volume (TV), and bone volume fraction (BV/TV) of 1-year-old *chd7<sup>-/-</sup>* and  
193 control zebrafish. We did not detect any significant differences in vBMD, BV or TV  
194 (Supplemental. Fig. 2). However, we found a significantly greater variance in TV of both  
195 intercalarium and parapophysis, as well as in BV of the parapophysis in 1-year-old *chd7<sup>-/-</sup>*  
196 zebrafish, as determined by F-test analysis (Supplemental Table 1). The same results were  
197 observed in 2-year-old *chd7<sup>-/-</sup>* compared to control zebrafish (Supplemental Table 2).

198 *Abnormal mineralization and malformations in the body end plates of precaudal vertebrae in*  
199 *adult zebrafish*

200 Vertebrae structures were analyzed by assessing key angles of the structure (Fig. 3A) and  
201 mineralization features. MicroCT analysis of precaudal vertebrae identified abnormal patterns  
202 of mineralization and abnormal structures, that were especially pronounced at the arches and  
203 transverse processes in 1-year old *chd7<sup>-/-</sup>* and control zebrafish (Fig. 3B, C). Precaudal vertebrae  
204 showed significantly higher overall vBMD, while the distribution of mineralization between



205 the body and arch remained unaffected (Fig. 3D, E). However, structurally, precaudal vertebrae  
206 of *chd7<sup>-/-</sup>* mutants show an increase in bone volume towards the body end plates of vertebrae,  
207 which in most cases include major malformations manifesting as highly mineralized inclusions  
208 (Fig. 3C, arrows). Additionally, vertebrae in 1-year-old *chd7<sup>-/-</sup>* zebrafish presented with a larger  
209 bone volume fraction (BV/TV) compared to controls (Fig. 3G-I). Analysis of the vertebrae  
210 neural arch revealed distortion with a significantly larger rising angle, as well as a larger  
211 variance of the angles (Fig. 3F). Vertebrae showed a significantly changed body angle and  
212 significant variance of body angle and vertebrae length (Supplemental Table 3). While a  
213 depletion of vBMD in the arches and abnormal vertebrae body structure was observed in 2-  
214 year-old fish, the effects seen on total vBMD and BV were not apparent in the few samples that  
215 survived until this stage (Supplemental Fig. 2 and Supplemental Table 4). Notably, one of our  
216 *chd7<sup>-/-</sup>* mutants showed vertebral fusion of the analyzed precaudal vertebra, which was not  
217 observed in any of the controls (Supplemental Fig. 1). This further demonstrates the wide  
218 variation in severity of the bone phenotype in *chd7<sup>-/-</sup>* zebrafish.

#### 219 *Abnormal caudal vertebrae in chd7<sup>-/-</sup> zebrafish vary in arch angles and reduced mineralization*

220 We next determined key structural features (Fig. 4A) and mineralization characteristics of  
221 caudal vertebrae. The *chd7<sup>-/-</sup>* zebrafish presented with warped hemal and neural arches and  
222 abnormal body structure compared to controls (Fig. 4B, C). Similar to precaudal vertebrae, the  
223 growth zones of the body end plates were enlarged and showed inclusions of highly mineralized  
224 matrix (Fig. 4C, arrows). Unlike control zebrafish, *chd7<sup>-/-</sup>* mutants had abnormal vertebrae body  
225 structure, which usually exhibited an hourglass shape and resulting in greater variance of  
226 measured body angles (Supplemental Table 3).

227 In line with the neural arch screened in the precaudal vertebrae, the hemal arch in the caudal  
228 vertebrae showed significantly wider arch rising angles (Fig. 4F), while the neural arch  
229 displayed significantly greater variance (Fig. 4G) in 1-year-old *chd7<sup>-/-</sup>* zebrafish. In contrast to

230 precaudal vertebrae data, the caudal vertebrae showed significantly larger variance of Total  
231 vBMD and of both arches and vertebral body vBMD (Supplemental Table 3). A significant  
232 insufficiency in mineralization of the arches compared to the vertebrae body was also measured  
233 in *chd7*<sup>-/-</sup> zebrafish compared to controls (Fig. 4D, E). Further analysis also revealed a  
234 significant variance in BV, TV and BV/TV in *chd7*<sup>-/-</sup> zebrafish compared to controls (Fig. 4H,  
235 I).

236 While significantly distorted arches were still observed in 2-year old mutants, the effects on  
237 vBMD and BV were not noticed in the few surviving fish that could be screened (Supplemental  
238 Fig. 3 and Supplemental Table 4).

#### 239 *Col2a1 of the ECM is depleted in chd7<sup>-/-</sup> zebrafish*

240 To perform a more complete analysis of the skeletal phenotype, we also examined the  
241 extracellular matrix (ECM) of bone structures in 6 dpf larvae and 1-year-old *chd7*<sup>-/-</sup> zebrafish.  
242 Gene expression analysis at 9 dpf revealed a significant downregulation of the ECM gene  
243 *col2a1a* (Fig. 5E). Antibody staining showed that all craniofacial structures are already depleted  
244 of the key Col2a1a protein by 5 dpf (Fig. 5A). Vacuole formation within the structures was  
245 apparently unimpaired. In adult *chd7*<sup>-/-</sup> zebrafish, immunofluorescence showed a striking  
246 depletion of Col2a1 in the cartilage of vertebrae seen in the Weberian and precaudal vertebrae,  
247 with almost abolished Col2a1 signal (Fig 5B). This pattern was effectively reproduced in all  
248 regions of the spine of *chd7*<sup>-/-</sup> zebrafish.

249 We tested further for cell nuclei and chondrocytes in vertebral cartilage. Hematoxylin-Eosin  
250 (HE) staining of Weberian apparatus and precaudal vertebrae sections showed a significant  
251 reduction in the number of nuclei measured in the vertebral cartilage of 1-year-old *chd7*<sup>-/-</sup>  
252 zebrafish and controls (Fig. 5C, F). Complementary analysis using Safranin/Fast Green O  
253 staining, revealed a significant reduction in the number of chondrocytes in the vertebral

254 cartilage in *chd7*<sup>-/-</sup> zebrafish in line with the HE staining (Fig. 5D, G). Altogether, the findings  
255 indicate an altered cartilage composition in addition to the observed bone deformations.

## 256 **Discussion**

### 257 *Efficiency of model*

258 CS is a multisystemic disorder likely involving a variety of underlying mechanisms that include  
259 CHD7. Therefore, different preclinical models are required to individually identify the various  
260 molecular mechanisms. Even though mouse models for CS exist, none have been reported to  
261 show the bone phenotype observed in CS patients. Our study presents a *chd7* deficient zebrafish  
262 that has a bone phenotype resembling that of CS patients, which we used to investigate skeletal  
263 development in CS. CS patients commonly present with square face, broad nasal bridge, small  
264 mouth and facial asymmetry (9). While scoliosis in CS patients has been attributed to poor  
265 muscular development, our study proposes an additional factor involving impaired early  
266 mineralization of bone in the vertebrae. In line with clinical features exhibited by CS patients,  
267 our mutants display craniofacial dysmorphism with reduced mineralization and spinal  
268 deformities indicative of scoliosis (10-12). Interestingly, our analysis revealed that craniofacial  
269 and vertebral abnormalities are already present in young larvae of *chd7*<sup>-/-</sup> zebrafish. Additional  
270 clinical studies will be required to investigate the onset of skeletal deformities in CS patients.  
271 However, early analysis of bone density and spinal development has been suggested by CS  
272 guidelines (45, 46). This early and detailed analysis may reveal less severe or early onset  
273 phenotypes. Similarly, we observed that adult *chd7*<sup>-/-</sup> zebrafish, which appeared without spinal  
274 deformities on visual inspection, showed signs of spinal abnormalities in microCT analysis,  
275 suggesting that mostly mild phenotypes reach this age. This is supported by the high lethality  
276 rate shown by Jamadagni et al. (unpublished), yet the underlying cause of lethality is still  
277 unclear. Even though 5 dpf old larvae were significantly smaller than their control counterparts,  
278 this is expected as part of the CHARGE phenotype. Nonetheless, overall morphology suggests

279 that they are not in a notable developmental delay. Unfortunately, key “landmarks” for  
280 development as previously proposed are expectedly affected in *chd7*<sup>-/-</sup> zebrafish, including  
281 overall growth, pigment migration, swimbladder inflation and mineralization (47). However,  
282 we can conclude if the mineralization effect observed at 9dpf was in fact developmental delay,  
283 we would expect mineralization to recover. Yet, the phenotype was still evident in later  
284 development (Supplemental Fig 1. D).

285 Progressive skeletal disorders such as osteopenia and osteoporosis are characterized by a  
286 reduction in bone mineralization over time leading to increased fracture risk (48). CS patients  
287 have been shown to present with significantly reduced bone mineral density (13).  
288 Correspondingly, reduced vertebrae mineralization in *chd7*<sup>-/-</sup> zebrafish by 12 dpf was observed  
289 in a previous study involving morpholinos in zebrafish which had observed a reduced  
290 mineralization of vertebral structures (27). Confirming previous data, we observed insufficient  
291 mineralization of vertebra along the posterior spinal column by 4 weeks of age. In earlier  
292 analysis of larvae at 6 dpf, we were not able to detect a delay in the onset of mineralization, but  
293 already by 9 dpf we saw a significant decrease in the number of calcified vertebrae.  
294 Furthermore, mineralization appeared to be less efficient in posterior vertebrae, which could  
295 signify an impairment in ossification, since vertebrae in zebrafish undergo ossification from an  
296 anterior to posterior direction (49). An exception from this rule is the Weberian vertebrae C1  
297 and C2, which are ossified later in wildtypes but earlier in *chd7*<sup>-/-</sup> mutants. The craniofacial  
298 abnormalities we observed are in line with known neural crest deficiencies in CS which are  
299 known to affect cartilage and bone development (50).

### 300 *Nutrient dependency*

301 Our study showed that the onset of calcification was not delayed in *chd7* deficient zebrafish.  
302 However, progressing calcification was decreased already 4 days post feeding onset, even  
303 though access to food was identical in control and mutants. In contrast, differences in

304 calcification of vertebrae in control and mutants without access to food was not significant.  
305 Previous studies have shown that feeding delay until 9 dpf does not affect future fish growth  
306 and viability and was therefore our cut-off point(51). This data suggests that possibly an  
307 underlying mechanism involving either reduced uptake or metabolizing nutrients may play a  
308 part in the observed phenotype and this link remains to be investigated. Bone calcification and  
309 mineralization is dependent on proper nutrition and is often discussed regarding optimal bone  
310 health in humans (52). Insufficient levels of calcium and nutritional uptake are considered an  
311 increased risk for bone injury in CS patients (11). To optimize nutritional uptake, the  
312 supplementation of calcium and other nutrients to counteract poor bone health has been  
313 proposed for CS patients (53). In fact, case reports show supplementation with calcium and  
314 vitamin D significantly increased aBMD in CS patients (54). A possible nutrient deficiency in  
315 CS, could be linked to gastrointestinal nutrient uptake difficulties in *chd7*<sup>-/-</sup> zebrafish (55), yet  
316 this needs to be further investigated. Thus, this possible deficiency in nutrient uptake could  
317 further hinder ossification in *chd7*<sup>-/-</sup> mutants. We propose using our zebrafish model of CS  
318 model to test the effect of guidelines such as calcium and nutrient supplementation, nutrient  
319 metabolism and mechanical loading in form of swim training to enhance bone strength in CS.

#### 320 *Loss of chd7 reduces osteogenesis in zebrafish*

321 Osteoblast precursors commonly express differentiation markers such as *runx2* and *Osterix/sp7*  
322 (56). Upon maturation of these osteoblasts, expression of mineralization related genes such as  
323 *bglap* (osteocalcin) are expressed. Analysis of these three genes showed that they were all  
324 significantly downregulated in *chd7*<sup>-/-</sup> larvae. This suggests a deficiency in mature osteoblasts,  
325 required for the mineralization of facial bone structures and early spinal column. Misregulation  
326 or loss of these genes, such as *osterix/sp7* has been directly linked to poor bone mineralization  
327 in zebrafish and humans (57-59). Notably, among all osteogenesis related gene expressions  
328 significantly reduced in *chd7*<sup>-/-</sup> larvae, *sost*, *ctsk*, *acp5* and *col2a1* have been identified as direct

329 regulatory targets of Chd7 by Chip-Seq (60). Furthermore, the regulation of osteogenesis has  
330 been linked to a regulatory complex with PPAR $\gamma$  (23). Cell culture experiments have proposed  
331 the role of CHD7 in osteogenesis by inhibiting PPAR $\gamma$  target genes by a protein complex  
332 involving CHD7, NLK and SETDB1. Upon loss of CHD7 this complex will fail to inhibit  
333 PPAR $\gamma$  target genes and therefore inhibit osteogenesis in preference over adipogenesis (23).  
334 Strikingly, our qPCR results are consistent with downregulation of Ppar $\gamma$  target genes such as  
335 *runx2a* and *runx2b*. Furthermore, gene expression relevant for bone calcification and  
336 remodelling are misregulated such as *sost* and *ctsk*. Thus, our study is the first to indicate the  
337 conservation of the proposed pathway shown in cell culture in an *in vivo* model.

### 338 *Weberian apparatus*

339 The Weberian apparatus is a specialized structure that connects the auditory system and the  
340 swim bladder in a complex with the first 4 vertebrae to amplify sound vibrations (33). Our  
341 results show that key structures in the apparatus fail to efficiently form and/or mineralize. Two  
342 of these structures, the tripus and the parapophysis, are formed to connect to the swim bladder.  
343 Both are malformed in all tested *chd7*<sup>-/-</sup> mutants to varying degrees. This malformation may  
344 imply an inefficiency in its function concerning both the swim bladder and auditory system.  
345 Ear abnormalities are a major symptom in CS patients and functionality is affected.  
346 Furthermore, the *chd7*<sup>-/-</sup> mutant shows swim bladder defects (Breuer et al., unpublished) that  
347 could be additionally affecting the morphology in tripus and parapophysis or vice versa. Even  
348 though the Weberian apparatus is extremely specialized for carp and carp-like fish  
349 (Ostariophysi), it is likely that it underlies the same pathways for osteogenesis as other parts of  
350 the spine.

### 351 *Abnormal vertebrae and vBMD variability*

352 We examined volumetric bone mineral density (vBMD) and other parameters (e.g. BV, TV) in  
353 vertebral bone structures. Most strikingly, we detected large variance in density and all

354 parameters examined, as well as some significant changes in both precaudal and caudal  
355 vertebrae. The large variance observed in *chd7*<sup>-/-</sup> mutants is in line with CS patients showing  
356 varying severity in spinal deformities (12, 61). Furthermore, previous studies have shown that  
357 even minor changes in the described parameters can impact the risk for spinal deformities and  
358 fractures in disease and under treatment (62, 63).

359 Another interesting feature we observed in most *chd7*<sup>-/-</sup> mutants, were highly mineralized  
360 inclusions, most commonly, localized towards the growth zone of the vertebrae. We did not  
361 identify the source of these highly mineralized structures, but they could be caused by localized  
362 clusters of osteoblasts during vertebrae mineralization. Another possibility is the occurrence of  
363 calcified cartilage, which is more mineralized in comparison to bone. However, this is highly  
364 speculative and histologic analysis of such small and highly localized structures will be  
365 challenging. Since these inclusions are highly mineralized, it seems likely that their appearance  
366 impairs the bone structurally as higher mineralized collagen is stiffer, yet less tough (64). It will  
367 be of interest to see if future studies can take a closer look at these previously unidentified  
368 features. While these minor defects could be involved in the structural integrity of the spine in  
369 CS patients, these minor features may be missed during dual-energy x-ray absorptiometry  
370 (DEXA) screens of CS patients when assessing aBMD.

371 Analysis revealed a decreased mineralization in the caudal vertebral arches of the mutant fish.  
372 This likely reduces the mechanical competence of these vertebrae in comparison to healthy  
373 vertebrae. A compromised mechanical competence alongside low BMD also increases fracture  
374 risk and can be an underlying cause of scoliosis (65-67). Unfortunately, natural history BMD  
375 data of CS patients throughout early development is not available, to the best of our knowledge.  
376 However, aBMD analysis of patients with idiopathic scoliosis in CS via DEXA scans has been  
377 studied and shows significant reduction in some cases (13, 68). In general, there is an increased  
378 fracture risk and incidence of scoliosis corresponding to decreased BMD, such as in osteopenia

379 and osteoporosis (48, 66). In line with this reduced mineralization an increased fracture and  
380 injury risk has been reported for CS patients (13). Accordingly, proper observation and focus  
381 on early DEXA analysis is considered for CS guidelines (45, 46). Our microCT analysis of  
382 zebrafish vertebra is not without limitations. An isotropic voxel size of 10.6  $\mu\text{m}$  cannot resolve  
383 cancellous bone structures thus overestimating bone volume. However, this limitation applies  
384 systemically so differences between groups hold true. Other outcomes such as BMD and shape  
385 are less affected by resolution.

386 Our analysis throughout development of *chd7*<sup>-/-</sup> deficient zebrafish suggests that only mild  
387 phenotypes survive onto later stages with severity decreasing as age progresses. However, the  
388 high lethality in both patients and our model is connected to a multisystemic phenotype in which  
389 one mechanism is unlikely to be the exclusive underlying cause for this characteristic. The link  
390 between *Chd7* and severe spinal and vertebrae abnormalities, including kyphosis has been  
391 observed in our samples (7, 9).

#### 392 *Collagen and chondrocyte depletion as novel risk factor*

393 Our data in *chd7* deficient zebrafish indicate that reduced vBMD may not be the only  
394 underlying risk factor for idiopathic scoliosis in CS patients. Furthermore, craniofacial  
395 development in CS may be dependent on ECM matrix composition. Bone matrix integrity may  
396 be weakened by a decrease in the collagen component *Col2a1* in the craniofacial and vertebral  
397 cartilage of *chd7* deficient zebrafish. *Col2a1* is required in the ECM of various cell types  
398 including osteoblasts, chondrocytes, external ligament connective tissue cells, as well as  
399 notochord basal cells and expressed in the corresponding tissues (69, 70). Each cell type is  
400 required for proper bone formation and could likely contribute to spinal injuries and  
401 malformations. Furthermore, *col2a1a* expression is observed throughout ossification of the  
402 notochord (71). Reduction in this collagen matrix in the notochord can affect proper  
403 calcification and is known to cause spondyloepiphyseal dysplasia congenita, which affects



404 skeletal and spine development (72). Strikingly, *sedc* mice, which are deficient in *Col2a1*, show  
405 enlargement and malformations in the growth plates of vertebrae and degeneration of cartilage,  
406 similar to our study in zebrafish (73). *Col2a1a* is expressed in osteoblasts and chondrocytes of  
407 teleosts and regulated by *sox9*, which in turn is known to be regulated by *chd7* (71, 74-76).  
408 Sox9 is also well known to be required in craniofacial development, such as its related factor  
409 Sox10, both of which have been connected to the craniofacial phenotype in CHARGE (77).  
410 The hypertrophic morphology of the chondrocytes seen in our study may further indicate signs  
411 of an altered matrix composition and may contribute to an increased risk in osteoporosis (78,  
412 79).

413 In summary, our study is the first to identify skeletal abnormalities linked to *chd7* deficiency.  
414 These abnormalities include morphological changes in the skull and vertebrae, reduced bone  
415 mineralization, impaired osteoblast activity, highly mineralized inclusions and *Col2a1*  
416 deficiency in the *chd7*<sup>-/-</sup> zebrafish model organism. The use of this preclinical model will allow  
417 for future studies to further understand the underlying mechanisms of spinal deformities in CS.

## 418 **Materials and Methods**

### 419 *Zebrafish husbandry*

420 Wildtype (Cntrl) and mutant (*chd7*<sup>-/-</sup>) zebrafish were kept at 28°C in a 12h/12h dark/light cycle  
421 and maintained in accordance with Westerfield et al.(80). All zebrafish in this study were fed a  
422 steady diet of Skretting®GemmaMicro starting at 5 dpf. Embryos were raised at 28.5°C and  
423 staged as previously described by Kimmel et al.(81) All experiments were performed in with  
424 the guidelines of the Canadian Council for Animal Care and the local ethics committee.

### 425 *Skeletal stainings and analysis of larvae*

426 Calcein staining was done as described(38). In short, zebrafish larvae at 6 or 9 dpf were exposed  
427 to calcein (2g/L) (Sigma-Aldrich) in water for 10 minutes. Larvae were then washed at least 3

428 times in fish water for 10 minutes to remove excess calcein. Larvae were then anesthetized  
429 using tricaine before being imaged using an AxioZoom V16 (Zeiss). For nutrition dependency  
430 tests, larvae were either deprived of food until 9 dpf or fed a regular Skretting®GemmaMicro  
431 diet starting at 5 dpf.

432 Alcein blue staining was performed according to (82).

433 Alizarin Red was performed as previously shown (83). In brief, larvae were fixed for 2 hours  
434 with 2% PFA. The PFA was then removed by washes in PBS 3x10 minutes and then placed in  
435 25% glycerol/0.1%KOH. Finally, larvae were stained with 0,05% Alizarin Red (Sigma-  
436 Aldrich) in H<sub>2</sub>O for 30 minutes and stored in 50% glycerol in 0.1%KOH.

#### 437 *MicroCT Imaging of the spinal and craniofacial skeleton*

438 Adult zebrafish were euthanized using tricaine (MS-222, Sigma-Aldrich). Tissue was fixed in  
439 4% PFA prior to microCT analysis. Ex vivo microCT at an isotropic voxel size of 10.6 µm  
440 (SkyScan1276, Bruker, Kontich, Belgium) was performed to assess differences in Weberian  
441 and vertebral bone mass, mineral density, and microstructure (55 kVp, Al 0.25 mm filter,  
442 200 µA source current, 0.3° steps for full 360°). Additionally, ex vivo microCT of craniofacial  
443 bone structures at an isotropic voxel size of 5.0 µm was performed (55 kVp, Al 0.25 mm filter,  
444 72 µA source current, 0.16° steps for full 360°) to assess morphological features of the skull...  
445 Images were reconstructed using standard reconstruction algorithms provided with the  
446 microCT. Spinal and craniofacial deformities of controls and mutants were analyzed of 1-year  
447 (n=8 for vertebrae, n=5 for skull) and 2-year-old (n=5) zebrafish.

#### 448 *Analysis and bone density/volume/angles*

449 From the reconstructed microCT images of the whole spine, the Weberian apparatus, as well as  
450 vertebrae 7 (abdominal) and 20 (caudal) were segmented. Further, the intercalarium, the tripus  
451 as well as the parapophysis were segmented from the Weberian apparatus. For the vertebrae,

452 the neural as well as the hemal arch were segmented from the vertebral body. To differentiate  
453 between bone and background, a density-based threshold of  $0.41 \text{ gHA/cm}^3$  determined by  
454 Otsu's method(84) was used. For each segmented bone in the Weberian apparatus outcomes  
455 included: bone volume BV ( $\text{mm}^3$ ), tissue volume TV ( $\text{mm}^3$ ), bone volume fraction BV/TV  
456 ( $\text{mm}^3/\text{mm}^3$ ) and volumetric bone mineral density vBMD ( $\text{gHA/cm}^3$ ). For abdominal and caudal  
457 vertebrae the outcomes included: bone volume BV, tissue volume TV, bone volume fraction  
458 BV/TV, total bone mineral density T.vBMD, vertebral body vBMD VB.BMD, vertebral arch  
459 vBMD VA.BMD, as well as arch-body angle, body angle, arch opening angle and rising angles  
460 (see Fig.2A and 3A). For caudal vertebrae, the angle outcomes were calculated for hemal as  
461 well as neural arches. Craniofacial outcomes included: mandibular arch length, complete skull  
462 length measured from the tip of the dentary to the furthest point of the supraoccipital, width of  
463 the skull, measured between the opercular tips as well as mandibular arch angle, and  
464 craniofacial angle.

#### 465 *qRT-PCR*

466 Total RNA was isolated from 9 dpf old zebrafish larvae using TriReagent.  $1\mu\text{g}$  of RNA was  
467 used for cDNA synthesis using cDNA vilo kit. qRT-PCR was performed with SYBR Green  
468 mix (BIORAD) with a Lightcycler96® (Roche). Gene expression was analyzed relative to the  
469 housekeeping gene *elf1 $\alpha$* . Primers used for *runx2a*, *runx2b*, *sost*, *bglap*, *sp7/osterix*, *mgp*,  
470 *postna*, *acp5a*, *ctsk*, *col2a1* and *mgp* are shown in supplementals Table 5.

#### 471 *Spinal sections/Stainings/Immunohistochemistry*

472 The zebrafish were euthanized in tricaine (MS-222, Sigma-Aldrich) and fixed for 3 days in 4%  
473 paraformaldehyde at  $4^\circ\text{C}$ , after the abdomen was opened to ensure proper fixation. The spinal  
474 cords were dissected and decalcified with EDTA 10 % for 3 days under agitation at RT. After  
475 fixation and decalcification, the zebrafish were embedded in paraffin. Longitudinal sections  
476 ( $5\mu\text{m}$ ) were obtained and were deparaffinized in xylene and were rehydrated in a graded series

477 of ethanol. The slides were stained with hematoxylin (STATLAB Medical Products, LLC) for  
478 4 min, and washed with alcohol-acid, and were rinsed with tap water. In the blueing step, the  
479 slides were soaked in saturated lithium carbonate solution for 10 sec, and then rinsed with tap  
480 water. Finally, staining was performed with eosin Y (STATLAB Medical Products, LLC) for 2  
481 min and mounted with Permount™ mounting medium.

482 For Safranin O/Fast green, after dehydration, the slides were stained with Weigert's  
483 hematoxylin (Sigma-Aldrich) for 4 min, wash under tap water, immersed in alcohol-acid for 5  
484 sec, then washed under water. The slides were stained with Fast green 0.02 % for 2 min, washed  
485 with acetic water 1% for 20 sec, then stained directly in safranin 0.01 % for 5 min and mounted  
486 with Permount™ mounting medium. Images were taken using an AxioZoom V16 (Zeiss) and  
487 area and number of nuclei were determined using ImageJ.

488 Immunofluorescence for Col2a1 was performed as previously shown. For 5 dpf larvae fish were  
489 fixed with 4% PFA overnight. Samples were blocked with 4% BSA in PBT (1% Triton) and  
490 samples placed in primary antibody for Col2a1 (1 in 20; Developmental studies hybridoma  
491 bank) at 4°C overnight. Then washed with PBT for several hours and then incubated with  
492 secondary antibody Goat-anti-Mouse AlexaFluor 488 (1 in 200) at 4°C overnight.

493 For 1-year old paraffin sections, epitope demasking was performed by digestion with Proteinase  
494 K (20µg/ml). Tissue was blocked with NGS and samples treated with primary antibody for  
495 Col2a1 (1 in 10; Developmental studies hybridoma bank) and secondary antibody Goat-anti-  
496 Mouse Alexafluor 488 (1 in 300). Counter stain was done using DAPI-mounting medium.

497 Images were taken using a LSM780 (Zeiss).

#### 498 *Statistics*

499 Statistical analysis was carried out using Prism-GraphPad® (GraphPad, San Diego, CA, USA).  
500 qPCR data and nuclei quantification were tested with student's t-test with Welch's correction.

501 Calcification analysis in larvae was performed with one-way ANOVA and post-hoc Tukey  
502 Test. MiroCT data of Control vs *chd7<sup>-/-</sup>* mutants was analyzed using student's t-test with  
503 Welch's correction and Variance determined by F-test analysis. Significance was determined  
504 at \* $<0.05$ ; \*\* $<0.01$  and \*\*\* $<0.001$

505

## 506 **Acknowledgements**

507 The authors would like to thank Beatrice Steyn and Priyanka Jamadagni for experimental  
508 support, and Mark Lepik for graphic design. SP is supported by the Natural Science and  
509 Engineering Research Council (NSERC), Canadian Institutes of Health Research (CIHR), an  
510 ALS Canada-Brain Canada Career Transition Award and a FRQS Junior 1 research  
511 scholar. BMW is supported by FRQS Programme de bourses de chercheur. MR is supported by  
512 FRQS Programme de bourses de chercheur. We also thank Shriners Hospital for Children and  
513 the CIHR (165939) for financial support.

514

## 515 **Author roles**

516 MB, MR, BMW and SP designed the study. MB, MR and CZ performed the experiments. MB  
517 and MR drafted the manuscript. MB, MR, CZ, BMW, SP reviewed and edited the manuscript.

518

## 519 **References**

- 520 1. Wise CA, Gao X, Shoemaker S, Gordon D, Herring JA. Understanding genetic factors in  
521 idiopathic scoliosis, a complex disease of childhood. *Curr Genomics*. 2008;9(1):51-9.
- 522 2. Grauers A, Einarsdottir E, Gerdhem P. Genetics and pathogenesis of idiopathic scoliosis.  
523 *Scoliosis Spinal Disord*. 2016;11:45.
- 524 3. Hall BD. Choanal atresia and associated multiple anomalies. *J Pediatr*. 1979;95(3):395-8.
- 525 4. Hittner HM, Hirsch NJ, Kreh GM, Rudolph AJ. Colobomatous microphthalmia, heart disease,  
526 hearing loss, and mental retardation--a syndrome. *J Pediatr Ophthalmol Strabismus*. 1979;16(2):122-  
527 8.

- 528 5. Pagon RA, Graham JM, Jr., Zonana J, Yong SL. Coloboma, congenital heart disease, and choanal  
529 atresia with multiple anomalies: CHARGE association. *J Pediatr.* 1981;99(2):223-7.
- 530 6. Blake KD, Salem-Hartshorne N, Daoud MA, Gradstein J. Adolescent and adult issues in CHARGE  
531 syndrome. *Clin Pediatr (Phila).* 2005;44(2):151-9.
- 532 7. Jongmans MC, Admiraal RJ, van der Donk KP, Vissers LE, Baas AF, Kapusta L, et al. CHARGE  
533 syndrome: the phenotypic spectrum of mutations in the CHD7 gene. *J Med Genet.* 2006;43(4):306-14.
- 534 8. Verloes A. Updated diagnostic criteria for CHARGE syndrome: a proposal. *Am J Med Genet A.*  
535 2005;133A(3):306-8.
- 536 9. Sanlaville D, Verloes A. CHARGE syndrome: an update. *Eur J Hum Genet.* 2007;15(4):389-99.
- 537 10. Doyle C, Blake K. Scoliosis in CHARGE: a prospective survey and two case reports. *Am J Med*  
538 *Genet A.* 2005;133A(3):340-3.
- 539 11. Forward KE, Cummings EA, Blake KD. Risk factors for poor bone health in adolescents and  
540 adults with CHARGE syndrome. *Am J Med Genet A.* 2007;143A(8):839-45.
- 541 12. Gao X, Gordon D, Zhang D, Browne R, Helms C, Gillum J, et al. CHD7 gene polymorphisms are  
542 associated with susceptibility to idiopathic scoliosis. *Am J Hum Genet.* 2007;80(5):957-65.
- 543 13. Kumaran A, Kirk J. Endocrine manifestations of CHARGE syndrome. *Endocrine Abstracts.*  
544 2013;33:P80.
- 545 14. Lalani SR, Safiullah AM, Fernbach SD, Harutyunyan KG, Thaller C, Peterson LE, et al. Spectrum  
546 of CHD7 mutations in 110 individuals with CHARGE syndrome and genotype-phenotype correlation.  
547 *Am J Hum Genet.* 2006;78(2):303-14.
- 548 15. Mitchell JA, Giangiacomo J, Hefner MA, Thelin JW, Pickens JM. Dominant CHARGE association.  
549 *Ophthalmic Paediatr Genet.* 1985;6(1-2):271-6.
- 550 16. Delahaye A, Sznajer Y, Lyonnet S, Elmaleh-Berges M, Delpierre I, Audollent S, et al. Familial  
551 CHARGE syndrome because of CHD7 mutation: clinical intra- and interfamilial variability. *Clin Genet.*  
552 2007;72(2):112-21.
- 553 17. Jones KM, Saric N, Russell JP, Andoniadou CL, Scambler PJ, Basson MA. CHD7 maintains neural  
554 stem cell quiescence and prevents premature stem cell depletion in the adult hippocampus. *Stem Cells.*  
555 2015;33(1):196-210.
- 556 18. Ohta S, Yaguchi T, Okuno H, Chneiweiss H, Kawakami Y, Okano H. CHD7 promotes proliferation  
557 of neural stem cells mediated by MIF. *Mol Brain.* 2016;9(1):96.
- 558 19. Okuno H, Renault Mihara F, Ohta S, Fukuda K, Kurosawa K, Akamatsu W, et al. CHARGE  
559 syndrome modeling using patient-iPSCs reveals defective migration of neural crest cells harboring  
560 CHD7 mutations. *Elife.* 2017;6.
- 561 20. Writzl K, Cale CM, Pierce CM, Wilson LC, Hennekam RC. Immunological abnormalities in  
562 CHARGE syndrome. *Eur J Med Genet.* 2007;50(5):338-45.
- 563 21. Feng W, Shao C, Liu HK. Versatile Roles of the Chromatin Remodeler CHD7 during Brain  
564 Development and Disease. *Front Mol Neurosci.* 2017;10:309.
- 565 22. Janssen N, Bergman JE, Swertz MA, Tranebjaerg L, Lodahl M, Schoots J, et al. Mutation update  
566 on the CHD7 gene involved in CHARGE syndrome. *Hum Mutat.* 2012;33(8):1149-60.
- 567 23. Takada I, Kouzmenko AP, Kato S. Wnt and PPARgamma signaling in osteoblastogenesis and  
568 adipogenesis. *Nat Rev Rheumatol.* 2009;5(8):442-7.
- 569 24. Chen Y, Wang M, Chen D, Wang J, Kang N. Chromatin remodeling enzyme CHD7 is necessary  
570 for osteogenesis of human mesenchymal stem cells. *Biochem Biophys Res Commun.*  
571 2016;478(4):1588-93.
- 572 25. Ogier JM, Carpinelli MR, Arhatari BD, Symons RC, Kile BT, Burt RA. CHD7 deficiency in "Looper",  
573 a new mouse model of CHARGE syndrome, results in ossicle malformation, otosclerosis and hearing  
574 impairment. *PLoS One.* 2014;9(5):e97559.
- 575 26. Hurd EA, Capers PL, Blauwkamp MN, Adams ME, Raphael Y, Poucher HK, et al. Loss of Chd7  
576 function in gene-trapped reporter mice is embryonic lethal and associated with severe defects in  
577 multiple developing tissues. *Mamm Genome.* 2007;18(2):94-104.
- 578 27. Patten SA, Jacobs-McDaniels NL, Zaouter C, Drapeau P, Albertson RC, Moldovan F. Role of Chd7  
579 in zebrafish: a model for CHARGE syndrome. *PLoS One.* 2012;7(2):e31650.



- 580 28. Busse B, Galloway JL, Gray RS, Harris MP, Kwon RY. Zebrafish: An Emerging Model for  
581 Orthopedic Research. *J Orthop Res.* 2020;38(5):925-36.
- 582 29. Carnovali M, Banfi G, Mariotti M. Zebrafish Models of Human Skeletal Disorders: Embryo and  
583 Adult Swimming Together. *Biomed Res Int.* 2019;2019:1253710.
- 584 30. Ofer L, Dean MN, Zaslansky P, Kult S, Schwartz Y, Zaretsky J, et al. A novel nonosteocytic  
585 regulatory mechanism of bone modeling. *PLoS Biol.* 2019;17(2):e3000140.
- 586 31. Hayes AJ, Reynolds S, Nowell MA, Meakin LB, Habicher J, Ledin J, et al. Spinal deformity in aged  
587 zebrafish is accompanied by degenerative changes to their vertebrae that resemble osteoarthritis.  
588 *PLoS One.* 2013;8(9):e75787.
- 589 32. Bergen DJM, Kague E, Hammond CL. Zebrafish as an Emerging Model for Osteoporosis: A  
590 Primary Testing Platform for Screening New Osteo-Active Compounds. *Front Endocrinol (Lausanne).*  
591 2019;10:6.
- 592 33. Dahdul WM, Lundberg JG, Midford PE, Balhoff JP, Lapp H, Vision TJ, et al. The teleost anatomy  
593 ontology: anatomical representation for the genomics age. *Syst Biol.* 2010;59(4):369-83.
- 594 34. Suniaga S, Rolvien T, Vom Scheidt A, Fiedler IAK, Bale HA, Huysseune A, et al. Increased  
595 mechanical loading through controlled swimming exercise induces bone formation and mineralization  
596 in adult zebrafish. *Sci Rep.* 2018;8(1):3646.
- 597 35. Haga Y, Dominique VJ, 3rd, Du SJ. Analyzing notochord segmentation and intervertebral disc  
598 formation using the *twhh:gfp* transgenic zebrafish model. *Transgenic Res.* 2009;18(5):669-83.
- 599 36. Morin-Kensicki EM, Melancon E, Eisen JS. Segmental relationship between somites and  
600 vertebral column in zebrafish. *Development.* 2002;129(16):3851-60.
- 601 37. Spoorendonk KM, Hammond CL, Huitema LFA, Vanoevelen J, Schulte-Merker S. Zebrafish as a  
602 unique model system in bone research: the power of genetics and in vivo imaging. 2010;26(2):219-24.
- 603 38. Xi Y, Chen D, Sun L, Li Y, Li L. Characterization of zebrafish mutants with defects in bone  
604 calcification during development. *Biochem Biophys Res Commun.* 2013;440(1):132-6.
- 605 39. MacRae CA, Peterson RT. Zebrafish as tools for drug discovery. *Nature reviews Drug discovery.*  
606 2015;14(10):721-31.
- 607 40. Fleming A, Sato M, Goldsmith P. High-throughput in vivo screening for bone anabolic  
608 compounds with zebrafish. *J Biomol Screen.* 2005;10(8):823-31.
- 609 41. Boswell CW, Ciruna B. Understanding Idiopathic Scoliosis: A New Zebrafish School of Thought.  
610 *Trends Genet.* 2017;33(3):183-96.
- 611 42. Guo L, Ikegawa S, Shukunami C. Emergence of Zebrafish as a Model System for Understanding  
612 Human Scoliosis. In: Hirata H, Iida A, editors. *Zebrafish, Medaka, and Other Small Fishes: New Model*  
613 *Animals in Biology, Medicine, and Beyond.* Singapore: Springer Singapore; 2018. p. 217-34.
- 614 43. Gray RS, Wilm TP, Smith J, Bagnat M, Dale RM, Topczewski J, et al. Loss of *col8a1a* function  
615 during zebrafish embryogenesis results in congenital vertebral malformations. *Dev Biol.*  
616 2014;386(1):72-85.
- 617 44. Gistelink C, Kwon RY, Malfait F, Symoens S, Harris MP, Henke K, et al. Zebrafish type I collagen  
618 mutants faithfully recapitulate human type I collagenopathies. *Proc Natl Acad Sci U S A.*  
619 2018;115(34):E8037-E46.
- 620 45. de Geus CM, Free RH, Verbist BM, Sival DA, Blake KD, Meiners LC, et al. Guidelines in CHARGE  
621 syndrome and the missing link: Cranial imaging. *Am J Med Genet C Semin Med Genet.*  
622 2017;175(4):450-64.
- 623 46. Trider CL, Arra-Robar A, van Ravenswaaij-Arts C, Blake K. Developing a CHARGE syndrome  
624 checklist: Health supervision across the lifespan (from head to toe). *Am J Med Genet A.*  
625 2017;173(3):684-91.
- 626 47. Parichy DM, Elizondo MR, Mills MG, Gordon TN, Engeszer RE. Normal table of postembryonic  
627 zebrafish development: staging by externally visible anatomy of the living fish. *Dev Dyn.*  
628 2009;238(12):2975-3015.
- 629 48. Aspray TJ, Hill TR. Osteoporosis and the Ageing Skeleton. *Subcell Biochem.* 2019;91:453-76.

- 630 49. Bensimon-Brito A, Cardeira J, Cancela ML, Huysseune A, Witten PE. Distinct patterns of  
631 notochord mineralization in zebrafish coincide with the localization of Osteocalcin isoform 1 during  
632 early vertebral centra formation. *BMC Dev Biol.* 2012;12:28.
- 633 50. Pauli S, Bajpai R, Borchers A. CHARGE with neural crest defects. *Am J Med Genet C Semin*  
634 *Med Genet.* 2017;175(4):478-86.
- 635 51. Hernandez RE, Galitan L, Cameron J, Goodwin N, Ramakrishnan L. Delay of Initial Feeding of  
636 Zebrafish Larvae Until 8 Days Postfertilization Has No Impact on Survival or Growth Through the  
637 Juvenile Stage. *Zebrafish.* 2018;15(5):515-8.
- 638 52. O'Keefe JH, Bergman N, Carrera-Bastos P, Fontes-Villalba M, DiNicolantonio JJ, Cordain L.  
639 Nutritional strategies for skeletal and cardiovascular health: hard bones, soft arteries, rather than vice  
640 versa. *Open Heart.* 2016;3(1):e000325.
- 641 53. Blake KD, Hudson AS. Gastrointestinal and feeding difficulties in CHARGE syndrome: A review  
642 from head-to-toe. *Am J Med Genet C Semin Med Genet.* 2017;175(4):496-506.
- 643 54. Foppiani L, Maffe A, Forzano F. CHARGE syndrome as unusual cause of hypogonadism:  
644 endocrine and molecular evaluation. *Andrologia.* 2010;42(5):326-30.
- 645 55. Cloney K, Steele SL, Stoyek MR, Croll RP, Smith FM, Prykhodzij SV, et al. Etiology and functional  
646 validation of gastrointestinal motility dysfunction in a zebrafish model of CHARGE syndrome. *FEBS J.*  
647 2018;285(11):2125-40.
- 648 56. Ortuno MJ, Susperregui AR, Artigas N, Rosa JL, Ventura F. Osterix induces Col1a1 gene  
649 expression through binding to Sp1 sites in the bone enhancer and proximal promoter regions. *Bone.*  
650 2013;52(2):548-56.
- 651 57. Kague E, Roy P, Asselin G, Hu G, Simonet J, Stanley A, et al. Osterix/Sp7 limits cranial bone  
652 initiation sites and is required for formation of sutures. *Dev Biol.* 2016;413(2):160-72.
- 653 58. Lapunzina P, Aglan M, Temtamy S, Caparros-Martin JA, Valencia M, Leton R, et al. Identification  
654 of a frameshift mutation in Osterix in a patient with recessive osteogenesis imperfecta. *Am J Hum*  
655 *Genet.* 2010;87(1):110-4.
- 656 59. Niu P, Zhong Z, Wang M, Huang G, Xu S, Hou Y, et al. Zinc finger transcription factor Sp7/Osterix  
657 acts on bone formation and regulates col10a1a expression in zebrafish. *Science Bulletin.*  
658 2017;62(3):174-84.
- 659 60. Rouillard AD, Gundersen GW, Fernandez NF, Wang Z, Monteiro CD, McDermott MG, et al. The  
660 harmonizome: a collection of processed datasets gathered to serve and mine knowledge about genes  
661 and proteins. *Database (Oxford).* 2016;2016.
- 662 61. Tilley MK, Justice CM, Swindle K, Marosy B, Wilson AF, Miller NH. CHD7 gene polymorphisms  
663 and familial idiopathic scoliosis. *Spine (Phila Pa 1976).* 2013;38(22):E1432-6.
- 664 62. Faulkner KG. Bone matters: are density increases necessary to reduce fracture risk? *J Bone*  
665 *Miner Res.* 2000;15(2):183-7.
- 666 63. Li XF, Li H, Liu ZD, Dai LY. Low bone mineral status in adolescent idiopathic scoliosis. *Eur Spine*  
667 *J.* 2008;17(11):1431-40.
- 668 64. Currey JD. *Bones: Structure and Mechanics*: Princeton University Press; 2006.
- 669 65. Zimmermann EA, Busse B, Ritchie RO. The fracture mechanics of human bone: influence of  
670 disease and treatment. *Bonekey Rep.* 2015;4:743.
- 671 66. Sarioglu O, Gezer S, Sarioglu FC, Koremezli N, Kara T, Akcali O, et al. Evaluation of vertebral  
672 bone mineral density in scoliosis by using quantitative computed tomography. *Pol J Radiol.*  
673 2019;84:e131-e5.
- 674 67. Wang Z, Chen H, Yu YE, Zhang J, Cheuk KY, Ng BK, et al. Unique local bone tissue characteristics  
675 in iliac crest bone biopsy from adolescent idiopathic scoliosis with severe spinal deformity. *Sci Rep.*  
676 2017;7:40265.
- 677 68. Modi A, Piziak V. MON-355 Charge Syndrome: Unusual Cause of Hypogonadism Leading to  
678 Osteoporosis. *J Endocr Soc.* 2020;4(Suppl 1):MON-355.
- 679 69. Kaneko T, Freeha K, Wu X, Mogi M, Uji S, Yokoi H, et al. Role of notochord cells and sclerotome-  
680 derived cells in vertebral column development in fugu, *Takifugu rubripes*: histological and gene  
681 expression analyses. *Cell Tissue Res.* 2016;366(1):37-49.



- 682 70. Jian QL, HuangFu WC, Lee YH, Liu IH. Age, but not short-term intensive swimming, affects  
683 chondrocyte turnover in zebrafish vertebral cartilage. *PeerJ*. 2018;6:e5739.
- 684 71. Dale RM, Topczewski J. Identification of an evolutionarily conserved regulatory element of the  
685 zebrafish *col2a1a* gene. *Dev Biol*. 2011;357(2):518-31.
- 686 72. Vikkula M, Metsaranta M, Ala-Kokko L. Type II collagen mutations in rare and common  
687 cartilage diseases. *Ann Med*. 1994;26(2):107-14.
- 688 73. Donahue LR, Chang B, Mohan S, Miyakoshi N, Wergedal JE, Baylink DJ, et al. A missense  
689 mutation in the mouse *Col2a1* gene causes spondyloepiphyseal dysplasia congenita, hearing loss, and  
690 retinoschisis. *J Bone Miner Res*. 2003;18(9):1612-21.
- 691 74. Akiyama H, Chaboissier MC, Martin JF, Schedl A, de Crombrugge B. The transcription factor  
692 *Sox9* has essential roles in successive steps of the chondrocyte differentiation pathway and is required  
693 for expression of *Sox5* and *Sox6*. *Genes Dev*. 2002;16(21):2813-28.
- 694 75. Bajpai R, Chen DA, Rada-Iglesias A, Zhang J, Xiong Y, Helms J, et al. CHD7 cooperates with PBAF  
695 to control multipotent neural crest formation. *Nature*. 2010;463(7283):958-62.
- 696 76. Eames BF, Amores A, Yan YL, Postlethwait JH. Evolution of the osteoblast: skeletogenesis in gar  
697 and zebrafish. *BMC Evol Biol*. 2012;12:27.
- 698 77. Asad Z, Pandey A, Babu A, Sun Y, Shevade K, Kapoor S, et al. Rescue of neural crest-derived  
699 phenotypes in a zebrafish CHARGE model by *Sox10* downregulation. *Hum Mol Genet*.  
700 2016;25(16):3539-54.
- 701 78. Hall AC. The Role of Chondrocyte Morphology and Volume in Controlling Phenotype-  
702 Implications for Osteoarthritis, Cartilage Repair, and Cartilage Engineering. *Curr Rheumatol Rep*.  
703 2019;21(8):38.
- 704 79. Lian C, Wang X, Qiu X, Wu Z, Gao B, Liu L, et al. Collagen type II suppresses articular chondrocyte  
705 hypertrophy and osteoarthritis progression by promoting integrin beta1-SMAD1 interaction. *Bone Res*.  
706 2019;7:8.
- 707 80. Westerfield M. The zebrafish book : a guide for the laboratory use of zebrafish (*Danio rerio*)  
708 4th ed. [Text.]. Eugene, OR: Institute of Neuroscience, University of Oregon ;, 2000 [Available from:  
709 [http://zfish.uoregon.edu/zf\\_info/zfbook/zfbk.html](http://zfish.uoregon.edu/zf_info/zfbook/zfbk.html)].
- 710 81. Kimmel CB, Ballard WW, Kimmel SR, Ullmann B, Schilling TF. Stages of embryonic development  
711 of the zebrafish. *Dev Dyn*. 1995;203(3):253-310.
- 712 82. Walker MB, Kimmel CB. A two-color acid-free cartilage and bone stain for zebrafish larvae.  
713 *Biotech Histochem*. 2007;82(1):23-8.
- 714 83. Aceto J, Nourizadeh-Lillabadi R, Maree R, Dardenne N, Jeanray N, Wehenkel L, et al. Zebrafish  
715 Bone and General Physiology Are Differently Affected by Hormones or Changes in Gravity. *PLoS One*.  
716 2015;10(6):e0126928.
- 717 84. Otsu N. A Threshold Selection Method from Gray-Level Histograms. *IEEE Transactions on*  
718 *Systems, Man, and Cybernetics*. 1979;9(1):62-6.

719

720

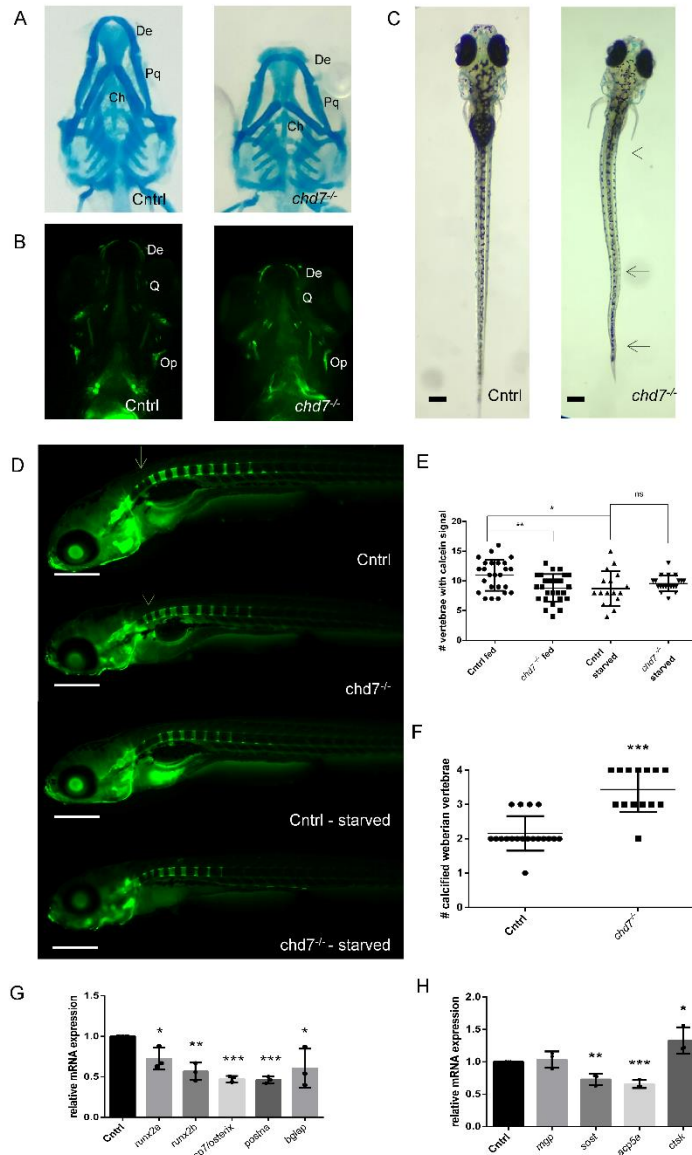

721

722 Fig 1. Mineralization in larval *chd7*<sup>-/-</sup> mutants

723 A. Alcian blue staining of 6 dpf control and *chd7*<sup>-/-</sup> zebrafish larvae, ventral view (De: dentary; Pq:  
 724 palatoquadrate; Ch: ceratohyal) B. Calcein staining of 6 dpf control and *chd7*<sup>-/-</sup> zebrafish larvae, ventral  
 725 view (De: dentary; Q: quadrate; Op: opercle) C. Dorsal view of control and *chd7*<sup>-/-</sup> larvae at 9 dpf  
 726 showing severe spinal deformities in 43 out of 110 larvae screened. Deformities were present at both  
 727 precaudal and caudal region (arrows). D. Lateral view of calcein staining at 9 dpf showing  
 728 mineralization of vertebrae with access to food starting at 5dpf and calcein staining at 9 dpf during  
 729 starvation. Arrow indicates mineralization at the first 4 (Weberian) vertebrae E. Number of vertebrae in  
 730 wildtype and *chd7*<sup>-/-</sup> (fed and starved) larvae showing calcification signal as tested by calcein and F.  
 731 Number of Weberian vertebrae (vertebrae 1-4) showing complete calcification (see arrows in b) G-H.  
 732 RT-qPCR of osteogenesis related genes screened at 9dpf, showing relative fold change. (Significance:  
 733 \*p<0.05; \*\*p<0.01; \*\*\*p<0.001)

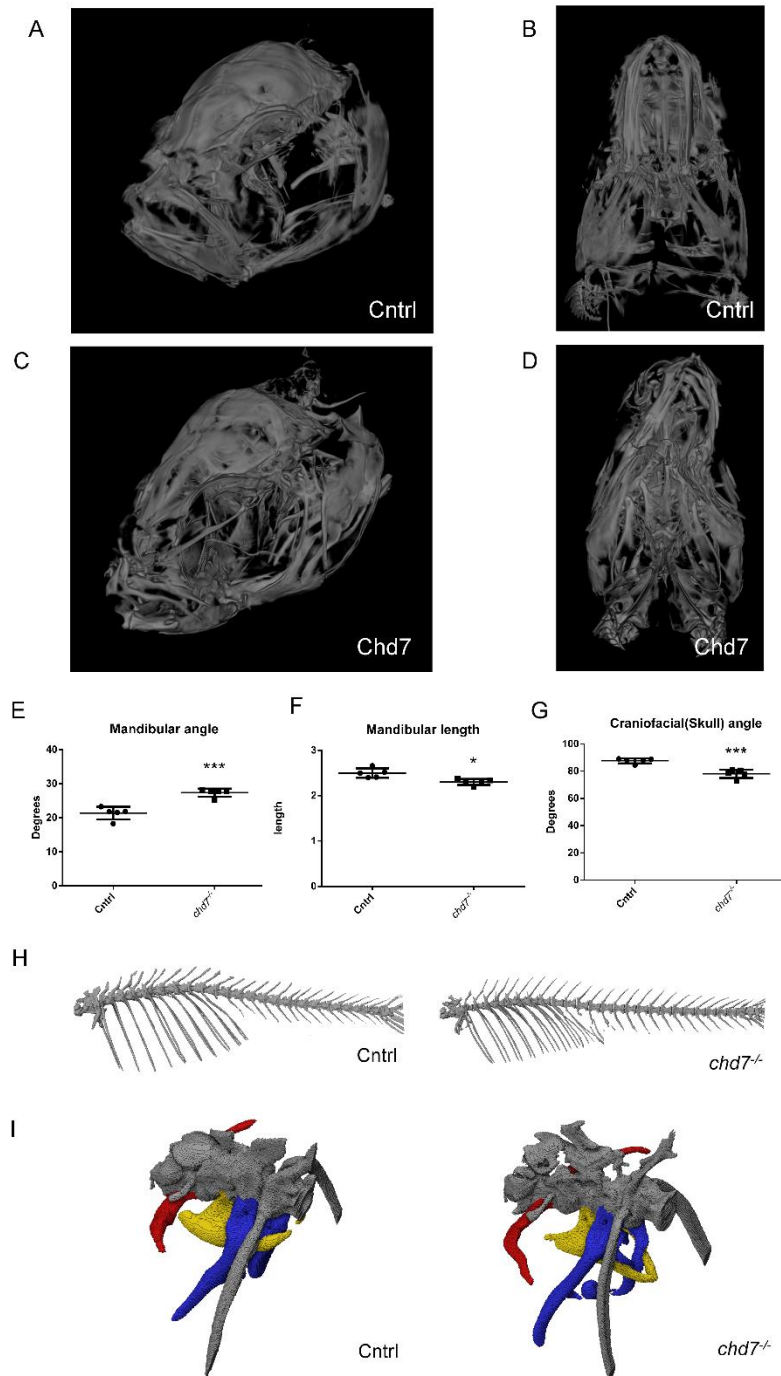

734

735 Fig 2. Skull deformities and Weberian apparatus

736 A, C. Lateral view of Control and *chd7*<sup>-/-</sup> adult zebrafish skull and B, D. ventral view of Control and  
737 *chd7*<sup>-/-</sup> adult zebrafish of mineralized tissue E. Angle of mandibular arch in adult zebrafish F. Length (in  
738 mm) of mandibular bone and G. Angle of the craniofacial (skull) structure H. Representative microCT  
739 overview image of the spinal cord from a 1-year old control and a *chd7*<sup>-/-</sup> adult zebrafish I. MicroCT  
740 Image of the Weberian apparatus from a 1-year old control and a *chd7*<sup>-/-</sup> mutants, indicating structures  
741 of intercalarium (red), tripus (yellow) and parapophysis (blue). Significance of student t-test with  
742 Welch's correction is included in the graphs with: \* $p < 0.05$ ; \*\* $p < 0.01$ , \*\*\* $p < 0.001$

743

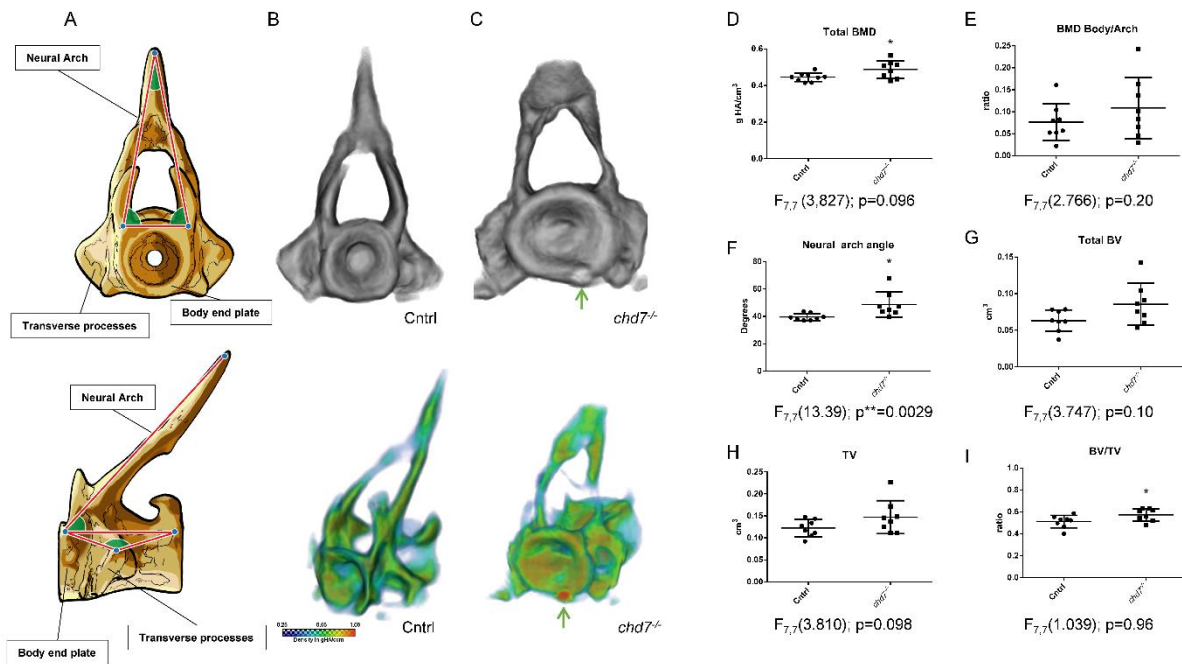

744

745 Fig 3. Precaudal vertebrae show inefficiency for proper mineralization

746 A. Sketch diagram of precaudal vertebrae (frontal and lateral) indicating structure and measured angles.

747 B-C. (top) Individual rendering of precaudal vertebrae, frontal view of tissue over 0.41 g HA/cm<sup>3</sup>

748 threshold and (bottom) vBMD intensity map (Range blue-red; 0.41 – 1.00 g HA/cm<sup>3</sup>) showing

749 morphological abnormalities and growth zone malformations with highly mineralized inclusions

750 (arrow) D. vBMD of whole vertebrae showing increasing density with increasing age and e. increasing

751 ratio of vBMD arch/vertebrae body. F-H neural arch angle, BV, TV and ratio BV/TV. (n=8/genotype

752 were analyzed). Significance of student t-test with Welch's correction is included in the graphs with:

753 \*p<0.05; \*\*p<0.01. F-test results are indicated underneath as F<sub>degree of freedom numerator, degree of freedom denominator</sub>

754 (F-value); p-value: \*p<0.05; \*\*p<0.01; \*\*\*p<0.001

755

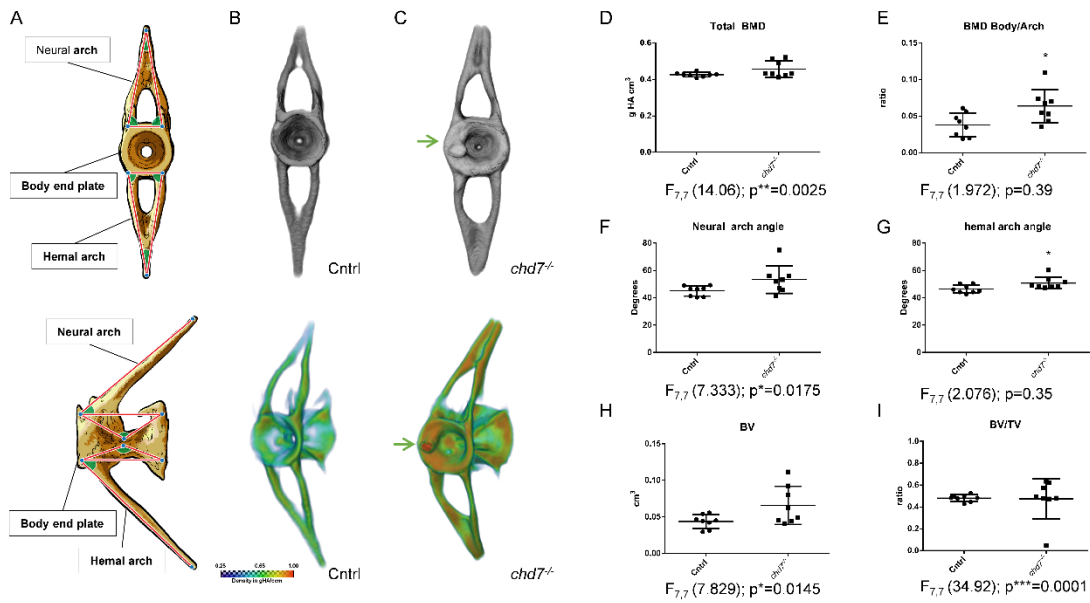

756

757 Fig 4. Caudal vertebrae show abnormal structure

758 A. Sketch diagram of precaudal vertebrae indicating structure and measured angles (frontal and lateral).  
 759 B-C. (top) Individual rendering of caudal vertebrae, frontal view of tissue over  $0.41 \text{ g HA/cm}^3$  threshold  
 760 and (bottom) vBMD intensity map (Range blue-red;  $0.41 - 1.00 \text{ g HA/cm}^3$ ) showing morphological  
 761 abnormalities and growth zone malformations with highly mineralized inclusions (arrow) D. vBMD of  
 762 whole vertebrae and E. increasing ratio of vBMD arch/vertebrae body. F-H neural arch angle, BV, TV  
 763 and ratio BV/TV. (n=8/genotype were analyzed). Significance of student t-test with Welch's correction  
 764 is included in the graphs with: \* $p < 0.05$ ; \*\* $p < 0.01$ . F-test results are indicated underneath as  $F_{\text{degree of}}$   
 765 freedom numerator, degree of freedom denominator (F-value); p-value: \* $p < 0.05$ ; \*\* $p < 0.01$ ; \*\*\* $p < 0.001$

766

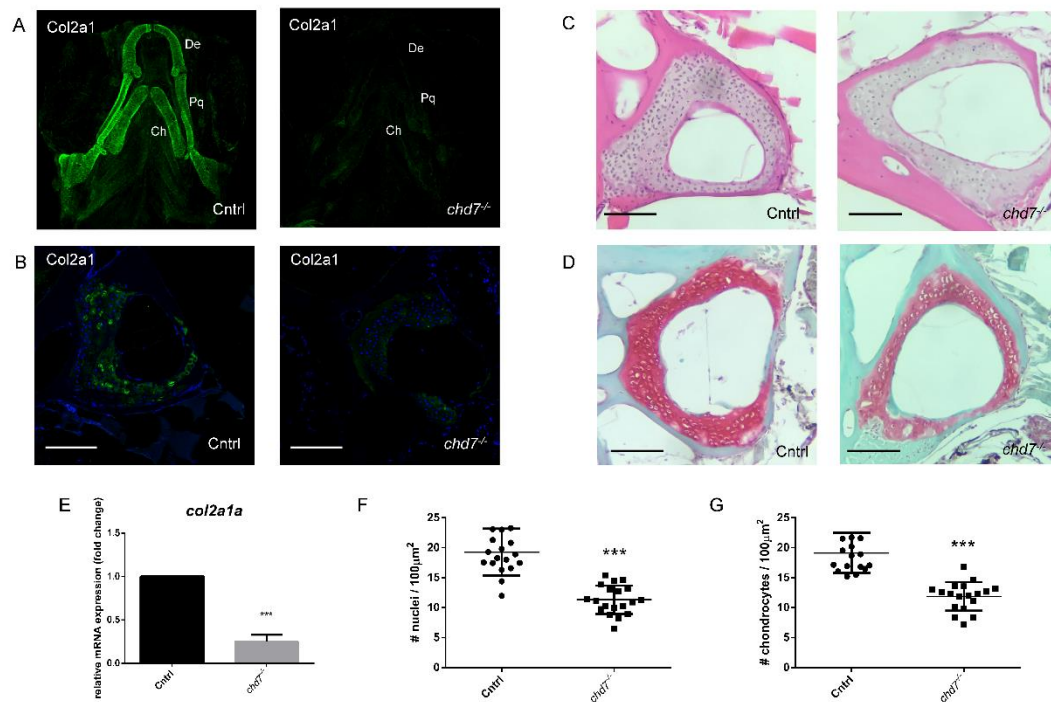

767

768 Fig 5. ECM Collagen2a1 deficiency in larvae and 1-year-old *chd7*<sup>-/-</sup> adults

769 A. Immunofluorescence of Col2a1 in 5 dpf Cntrl (n=9) and *chd7*<sup>-/-</sup> (n=8) larvae, ventral view of  
770 craniofacial cartilage (De: dentary; Pq: palatoquadrate; Ch: ceratohyal) B. Immunofluorescence of  
771 Col2a1 in precaudal vertebrae sections of Cntrl and *chd7*<sup>-/-</sup> mutants with Col2a1 in green and DAPI in  
772 blue. C. H&E staining of precaudal vertebrae section of Cntrl and *chd7*<sup>-/-</sup> mutants D. Safranin O/fast  
773 green staining of Weberian and precaudal vertebrae sections of Cntrl and *chd7*<sup>-/-</sup> mutants showing  
774 cartilage in red. E. RT-qPCR of *col2a1a* at 9dpf. F. Total nuclei count in Weberian and precaudal  
775 vertebral cartilage detected in H&E staining per 100µm<sup>2</sup> in Cntrl (N=4, n=17) and *chd7*<sup>-/-</sup> (N=4, n=18)  
776 G. Chondrocyte nuclei count in precaudal vertebral cartilage detected in Safranin O/fast green staining  
777 per 100µm<sup>2</sup> Cntrl (N=4, n=18) and *chd7*<sup>-/-</sup> (N=4, n=19) Scale bar presents 100µm. Significance of  
778 student t-test with: \*p<0.05; \*\*p<0.01 \*\*\*p<0.001

779
